# Supplementary material for: De novo discovery of metabolic heterogeneity with immunophenotype-guided imaging mass spectrometry
Source: PubMed Central journal article supplement — Mol Metab. 2020 Feb 14;36:100953. doi: 10.1016/j.molmet.2020.01.017 (PMC7149754; doi:10.1016/j.molmet.2020.01.017), 2020-02-14
Supplement: mmc1.pdf [file mmc1.pdf]

**Supplementary table 1 Network statistics for islets of Langerhans in Figure 3. Statistics were calculated with Cytoscape's plugin NetworkAnalyzer.**

| network name | cell type | clustering coef. | centralization | char. path length | avg. neighbors | nodes | edges | density | heterogeneity |
|--------------|-----------|------------------|----------------|-------------------|----------------|-------|-------|---------|---------------|
| islet A      | alpha     | 0.871            | 0.429          | 1.321             | 4.75           | 8     | 19    | 0.679   | 0.311         |
| islet A      | beta      | 0.788            | 0.495          | 1.429             | 8              | 15    | 60    | 0.571   | 0.332         |
| islet B      | alpha     | 0.795            | 0.467          | 1.333             | 4              | 7     | 14    | 0.667   | 0.299         |
| islet B      | beta      | 0.81             | 0.515          | 1.436             | 6.769          | 13    | 44    | 0.564   | 0.414         |
| islet C      | alpha     | 0.848            | 0.238          | 1.179             | 5.75           | 8     | 23    | 0.821   | 0.19          |
| islet C      | beta      | 0.848            | 0.393          | 1.306             | 5.556          | 9     | 25    | 0.694   | 0.307         |
| islet D      | alpha     | 1                | 0              | 1                 | 2              | 3     | 3     | 1       | 0             |
| islet D      | beta      | 1                | 0              | 1                 | 2              | 3     | 3     | 1       | 0             |
| islet E      | alpha     | 0.879            | 0.218          | 1.187             | 10.571         | 14    | 74    | 0.813   | 0.211         |
| islet E      | beta      | 0.871            | 0.25           | 1.194             | 6.444          | 9     | 29    | 0.806   | 0.208         |

**Supplementary table 2 Network statistics for gastric cancer tissues in Figure 6. Statistics were calculated with Cytoscape's plugin NetworkAnalyzer.**

| network name | HER2/neu | clustering coef. | centralization | char. path length | avg. neighbors | nodes | edges | density | heterogeneity |
|--------------|----------|------------------|----------------|-------------------|----------------|-------|-------|---------|---------------|
| A            | positive | 0.411            | 0.302          | 2.282             | 8.687          | 67    | 291   | 0.132   | 0.806         |
| A            | negative | 0.317            | 0.32           | 2.7               | 7.239          | 71    | 257   | 0.103   | 0.89          |
| B            | positive | 0.388            | 0.295          | 2.694             | 21.512         | 164   | 1764  | 0.132   | 1.003         |
| B            | negative | 0.379            | 0.289          | 2.682             | 20.412         | 171   | 1746  | 0.12    | 1.047         |
| C            | positive | 0.722            | 0.318          | 1.518             | 46.581         | 86    | 2003  | 0.548   | 0.417         |
| C            | negative | 0.595            | 0.321          | 1.681             | 30.963         | 81    | 1254  | 0.387   | 0.469         |

**Supplementary table 3 Network statistics for gastric cancer tissues in Figure 7. Statistics were calculated with Cytoscape's plugin NetworkAnalyzer.**

| network name | HER2/neu | clustering coef. | centralization | char. path length | avg. neighbors | nodes | edges | density | heterogeneity |
|--------------|----------|------------------|----------------|-------------------|----------------|-------|-------|---------|---------------|
| A            | positive | 0.335            | 0.305          | 2.659             | 5.529          | 34    | 94    | 0.168   | 0.781         |
| B            | positive | 0.418            | 0.207          | 2.44              | 2.4            | 30    | 36    | 0.083   | 0.702         |
| C            | positive | 0.39             | 0.197          | 3.262             | 3.897          | 39    | 76    | 0.103   | 0.777         |
| D            | positive | 0.257            | 0.103          | 4.71              | 2.611          | 36    | 47    | 0.075   | 0.544         |
| E            | positive | 0.483            | 0.335          | 2.947             | 3.939          | 33    | 65    | 0.123   | 0.807         |

Explanation of network metrics in tables 1-3:

- The clustering coefficient (0-1) describes, whether nodes in a network tend to form clusters.
- The centralization (0-1) of a network describes, whether the network has a center (star shaped).
- The network's characteristic path length is the average of the shortest path length between any pair of nodes.
- The density (0-1) describes how densely the network is populated with edges.
- The heterogeneity (0-1) of a network reflects, whether a network tends to contain hub nodes (i.e. well connected nodes).

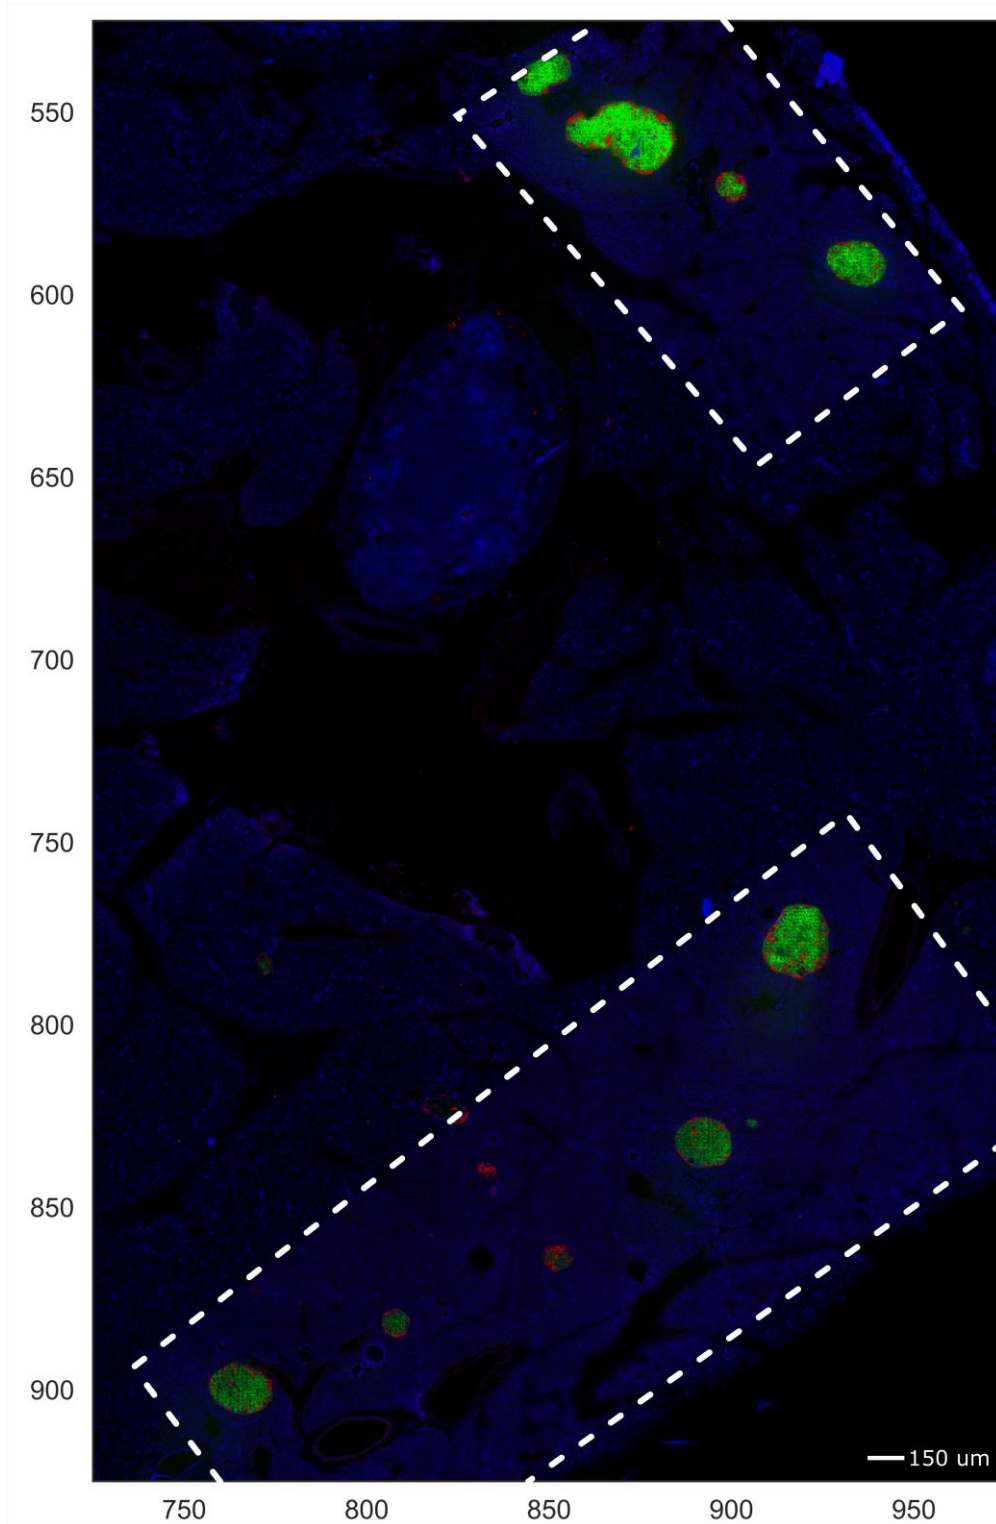

Supplementary figure 1 **Immunohistochemistry staining of mouse pancreas**: glucagon (red), insulin (green), DAPI (blue). The highlighted regions were analyzed with MALDI imaging prior to immunostaining.

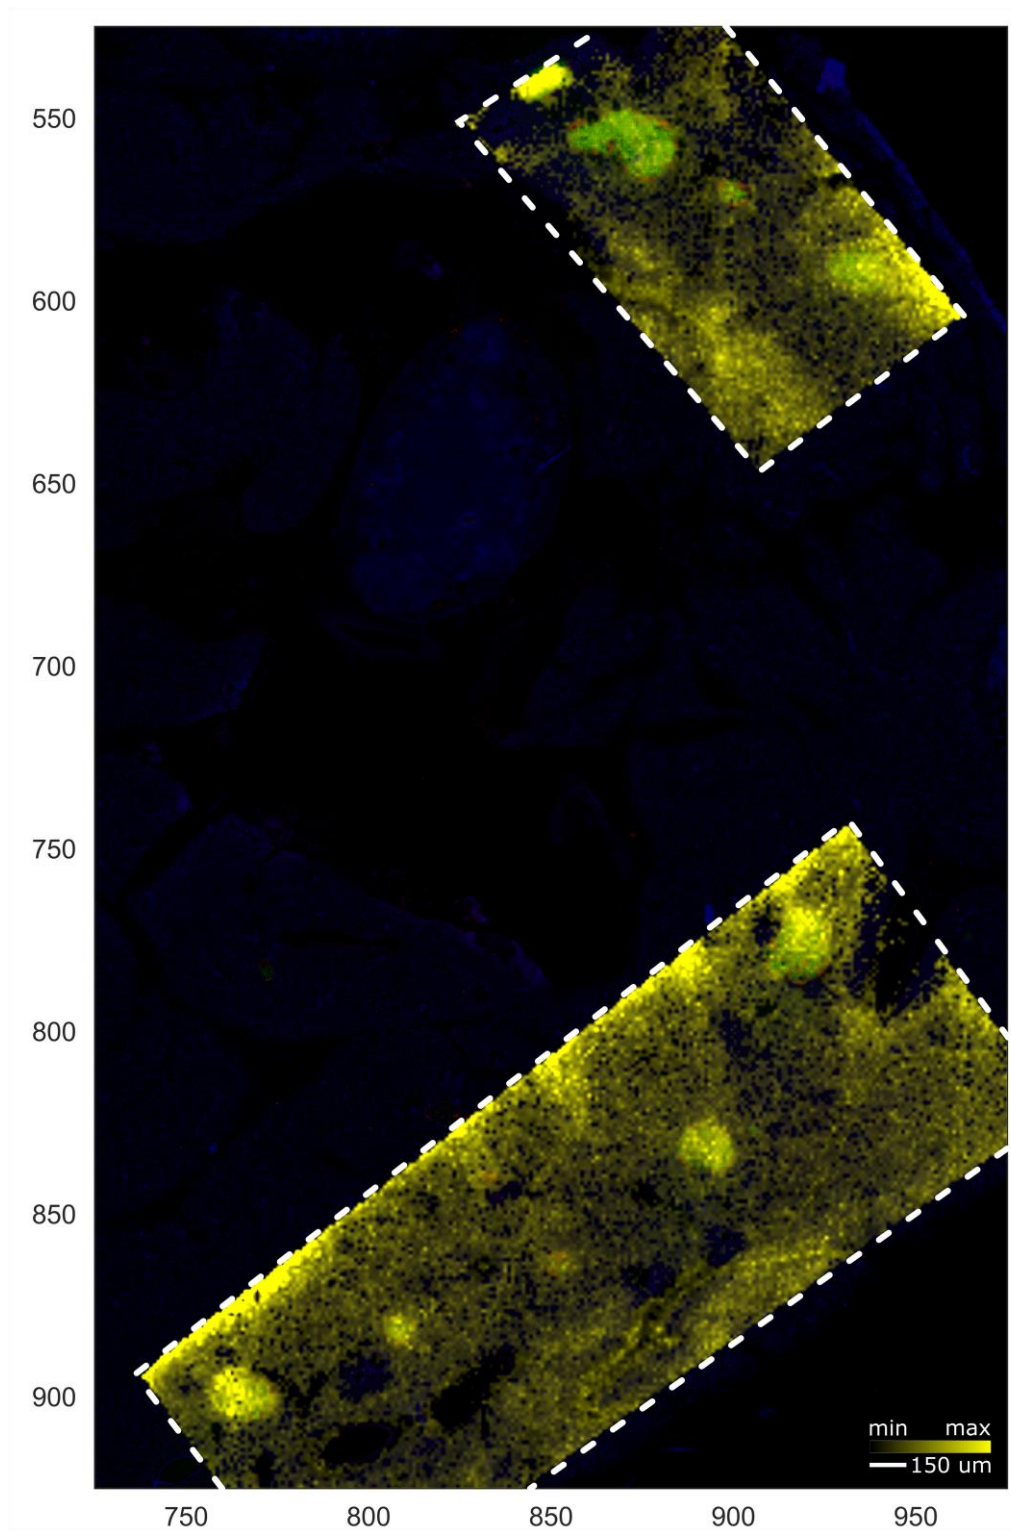

Supplementary figure 2 **Immunohistochemistry staining of mouse pancreas superimposed by molecular distribution of adenosine diphosphate (yellow)**. Glucagon (red), insulin (green), DAPI (blue). The highlighted regions were analyzed with MALDI imaging prior to immunostaining.

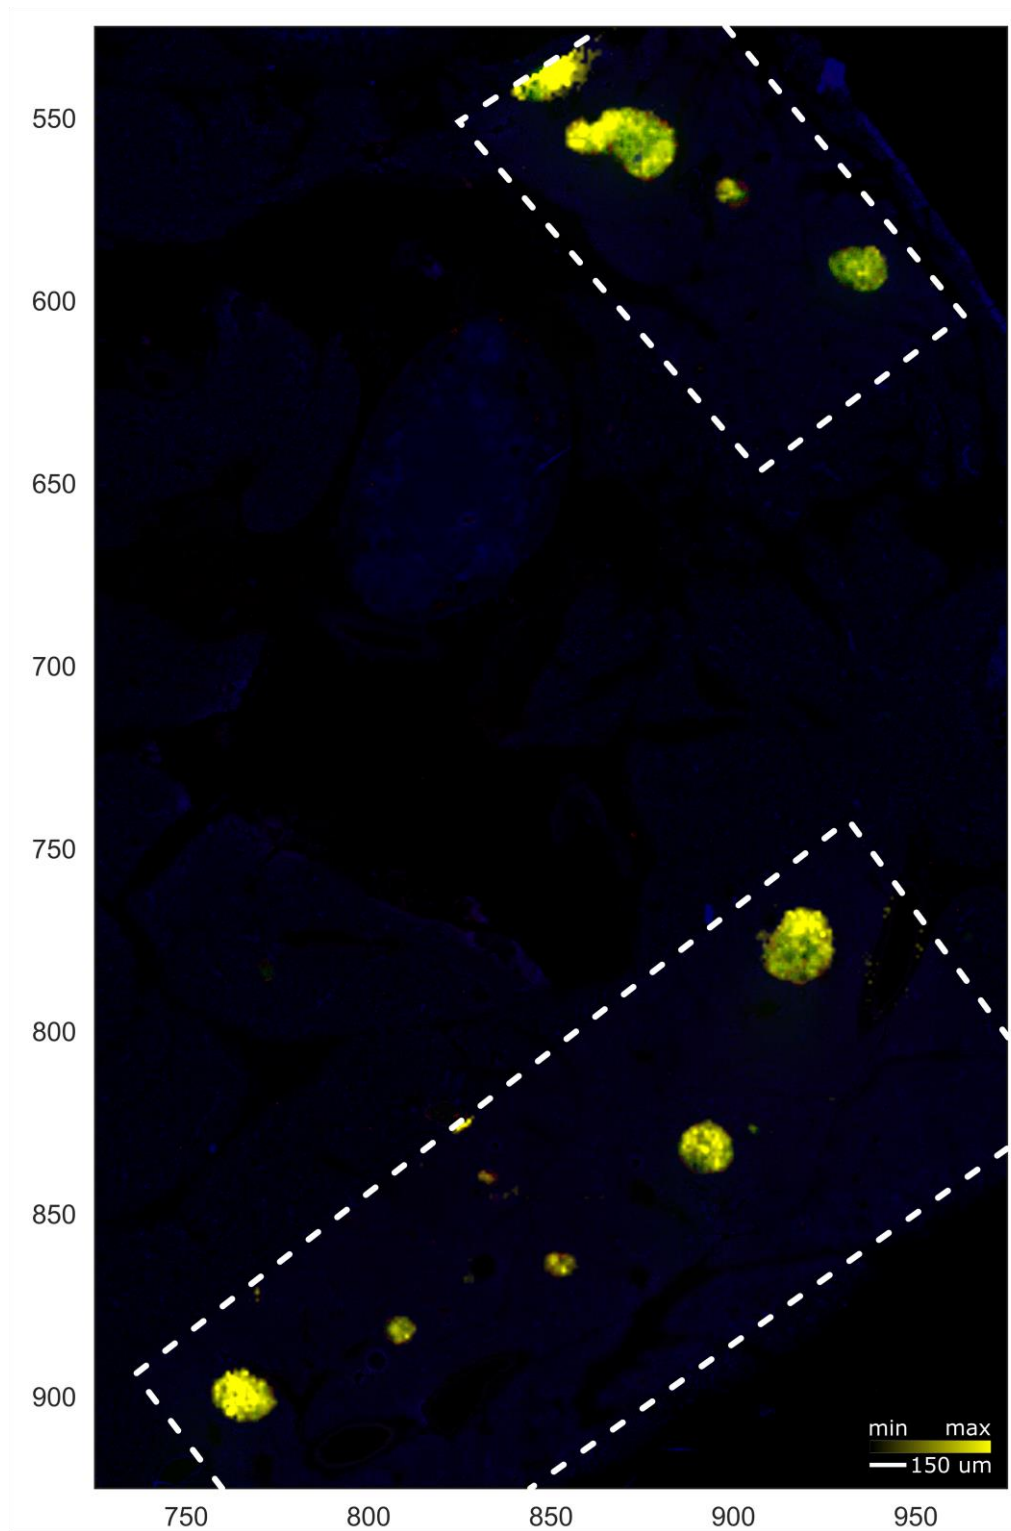

Supplementary figure 3 **Immunohistochemistry staining of mouse pancreas superimposed by molecular distribution of cholesterol sulfate (yellow)**. Glucagon (red), insulin (green), DAPI (blue). The highlighted regions were analyzed with MALDI imaging prior to immunostaining.



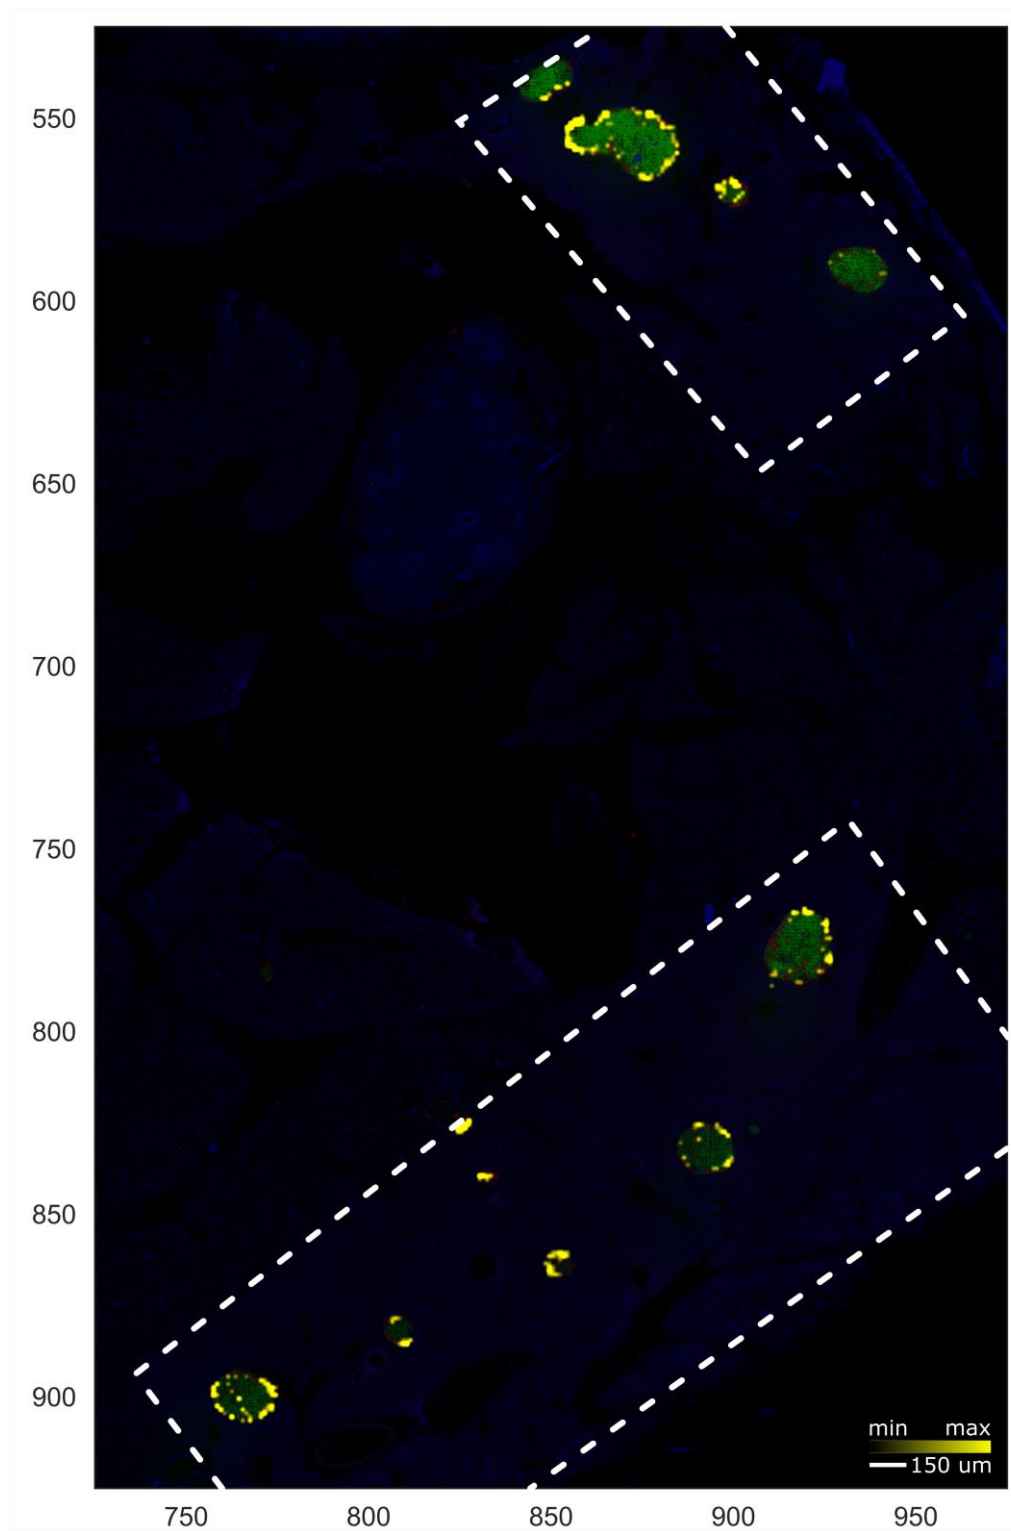

Supplementary figure 4 **Immunohistochemistry staining of mouse pancreas superimposed by molecular distribution of 3-O-sulfogalactosylceramide (yellow)**. Glucagon (red), insulin (green), DAPI (blue). The highlighted regions were analyzed with MALDI imaging prior to immunostaining.

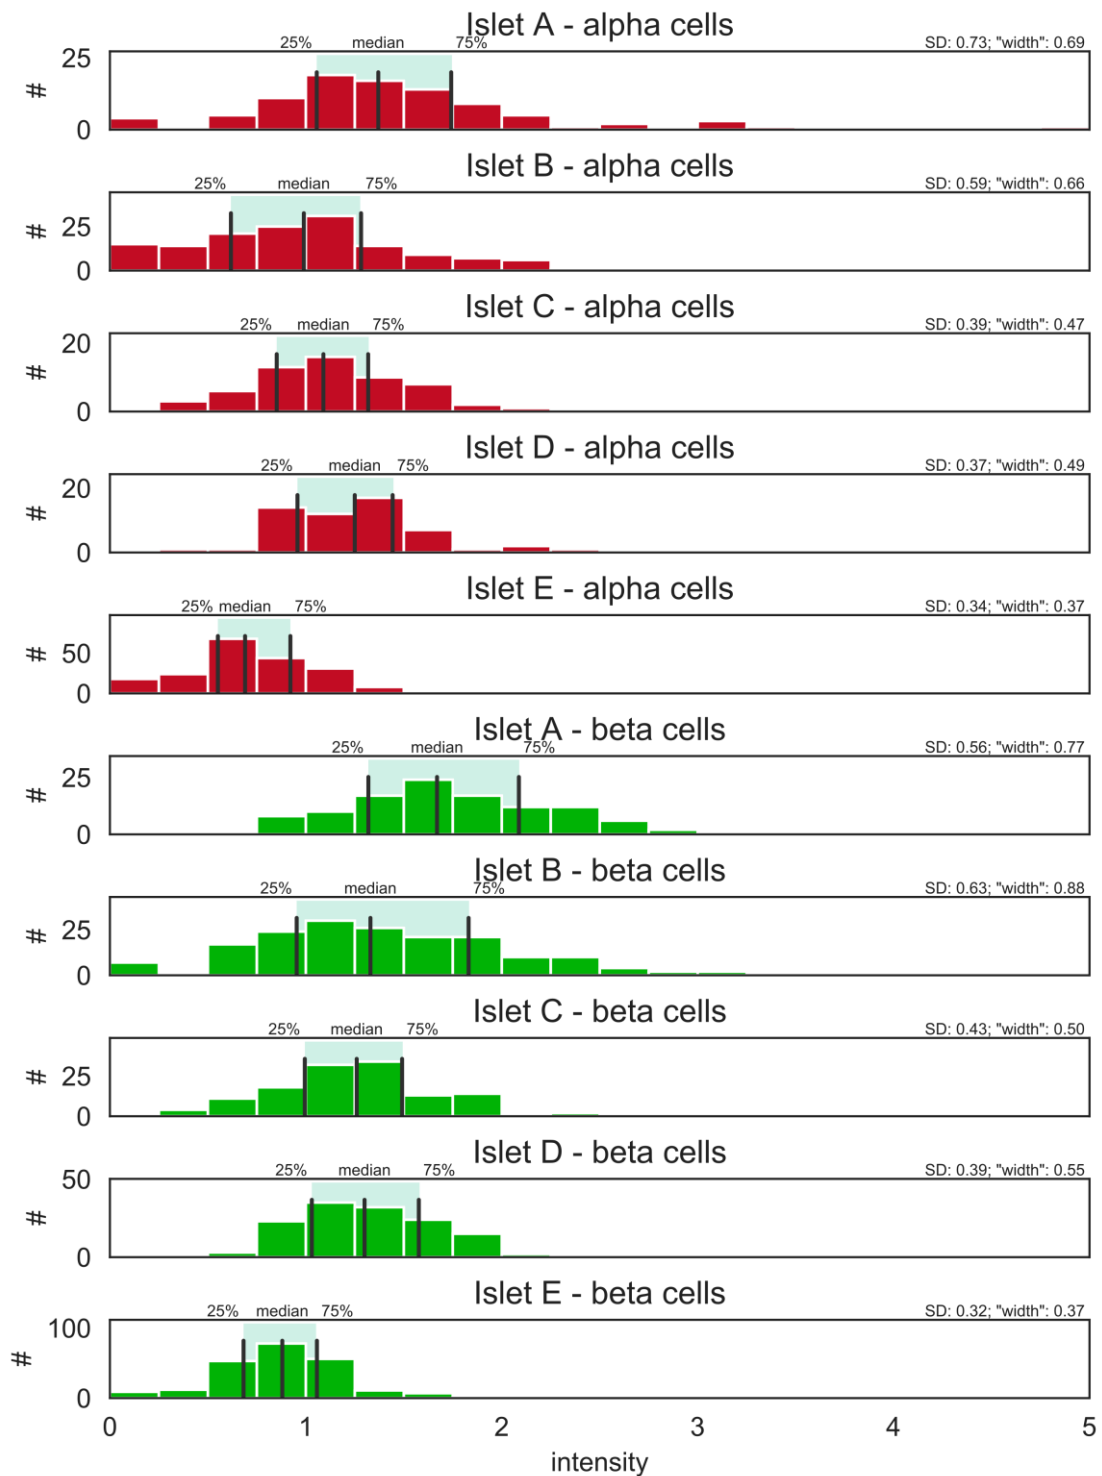

Supplementary figure 5 **Intensity distribution per islet of Langerhans and cell type for adenosine diphosphate.** The 25<sup>th</sup> percentile, median and 75<sup>th</sup> percentile are highlighted. SD: standard deviation; width: 75<sup>th</sup> percentile – 25<sup>th</sup> percentile.

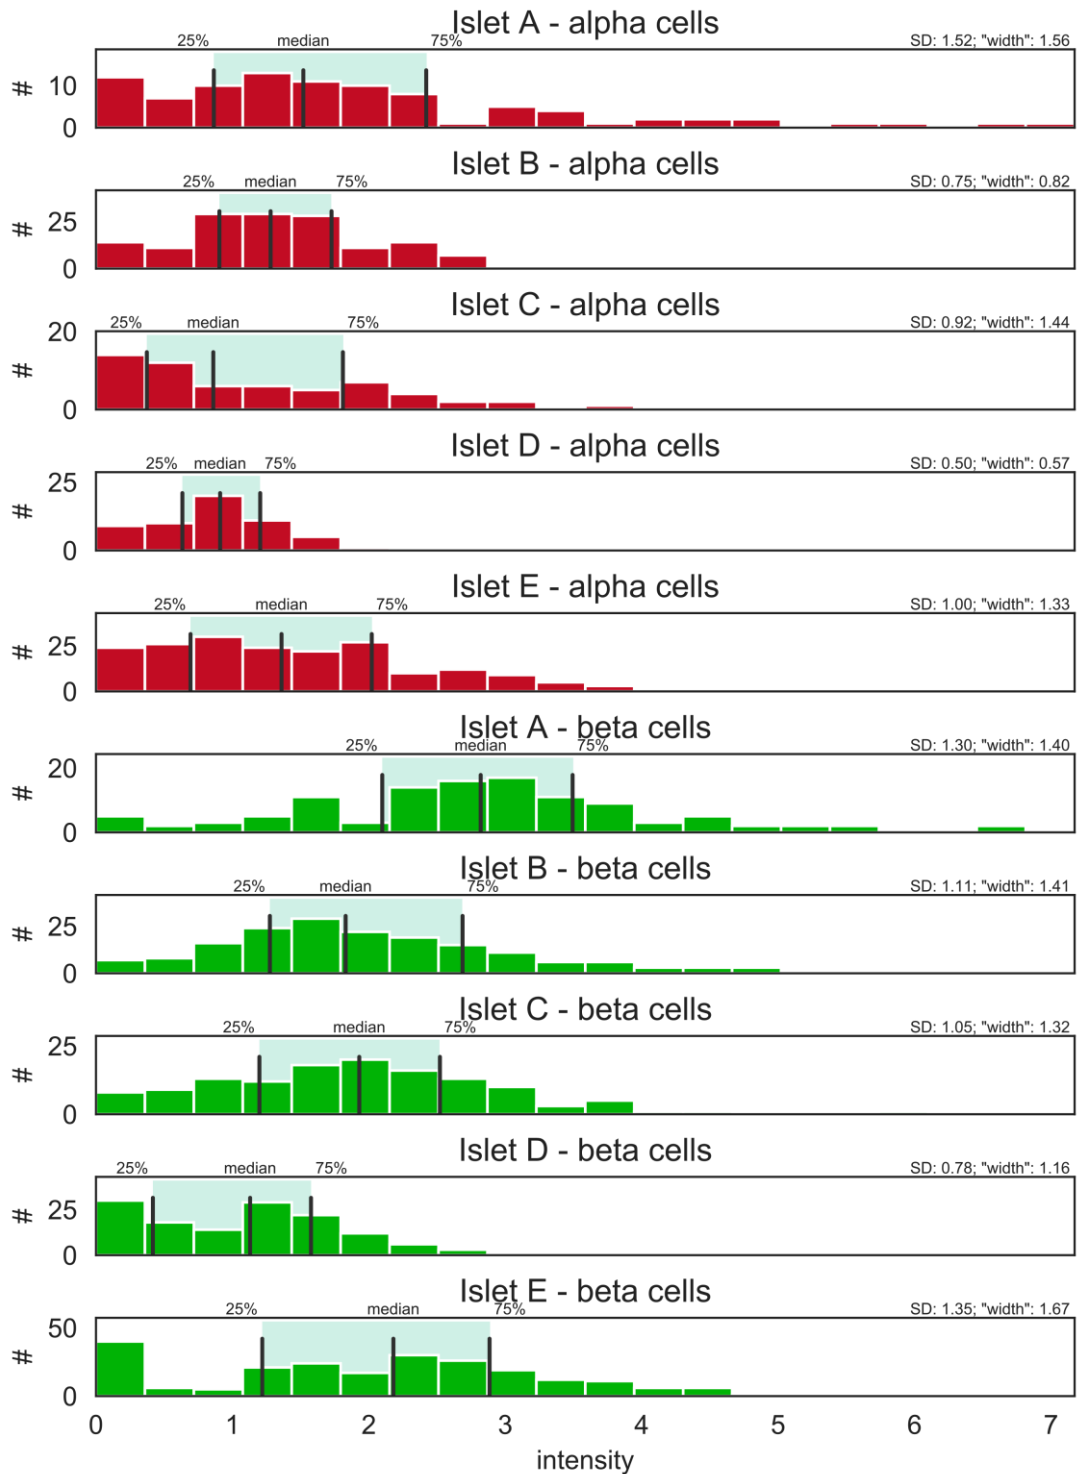

Supplementary figure 6 **Intensity distribution per islet of Langerhans and cell type for cholesterol sulfate.** The 25<sup>th</sup> percentile, median and 75<sup>th</sup> percentile are highlighted. SD: standard deviation; width: 75<sup>th</sup> percentile – 25<sup>th</sup> percentile.

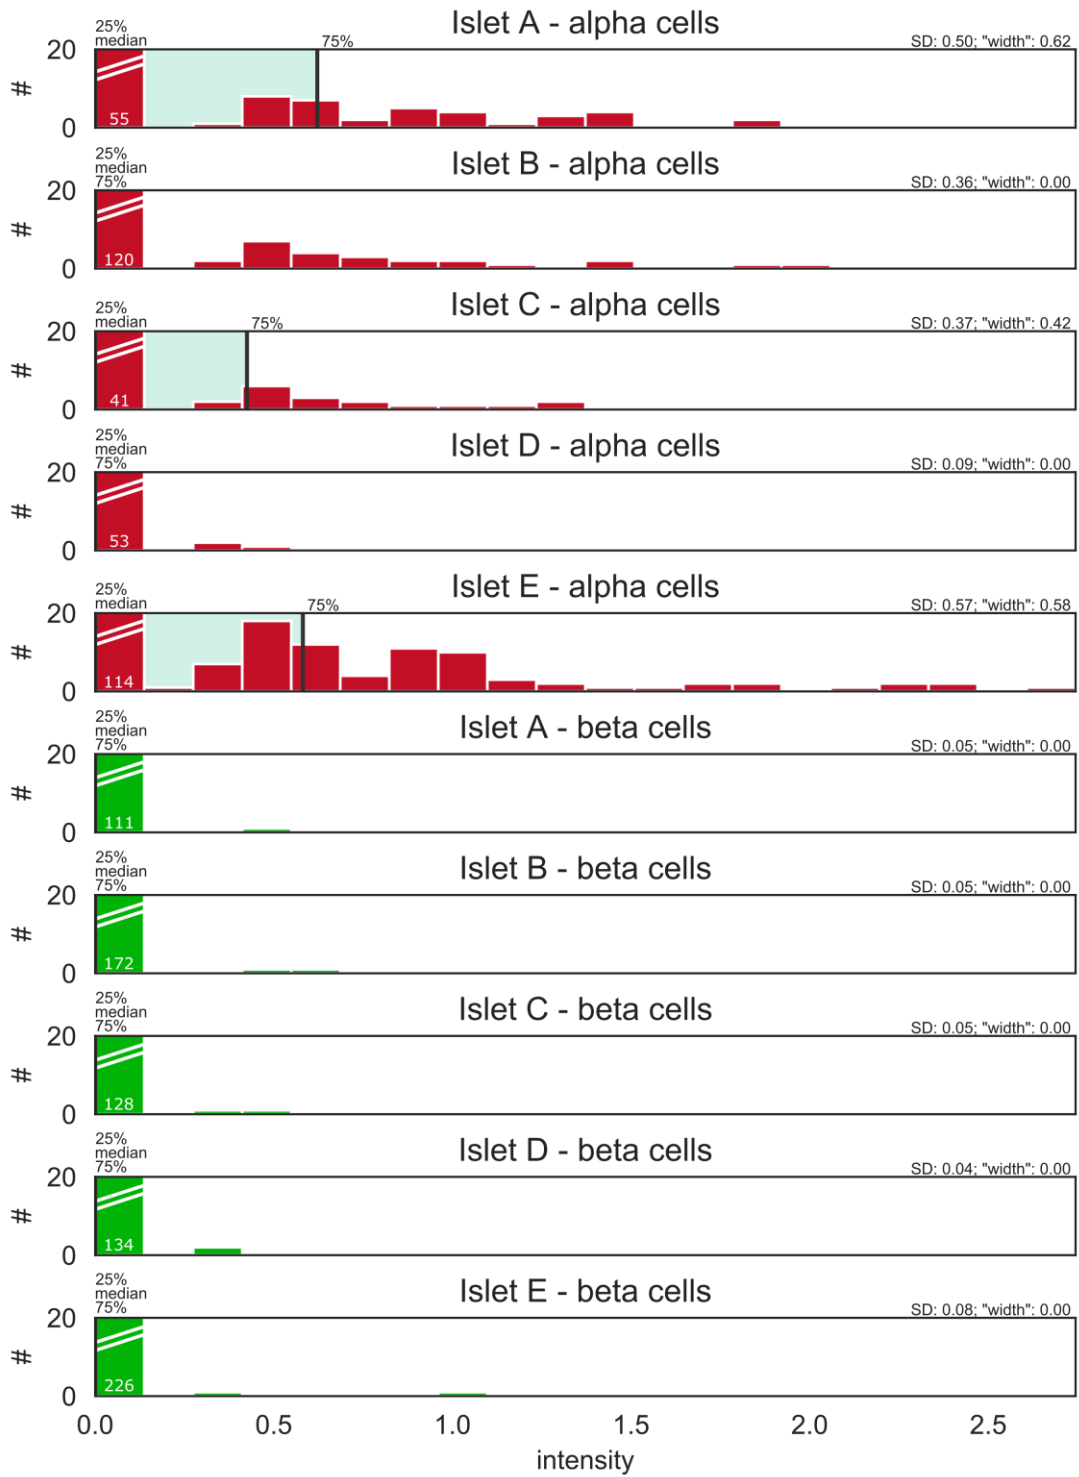

Supplementary figure 7 **Intensity distribution per islet of Langerhans and cell type for 3-O-sulfogalactosylceramide.** The 25<sup>th</sup> percentile, median and 75<sup>th</sup> percentile are highlighted. SD: standard deviation; width: 75<sup>th</sup> percentile – 25<sup>th</sup> percentile. The heights of the bars that exceed the y-axis limit of 20 is written per bar.



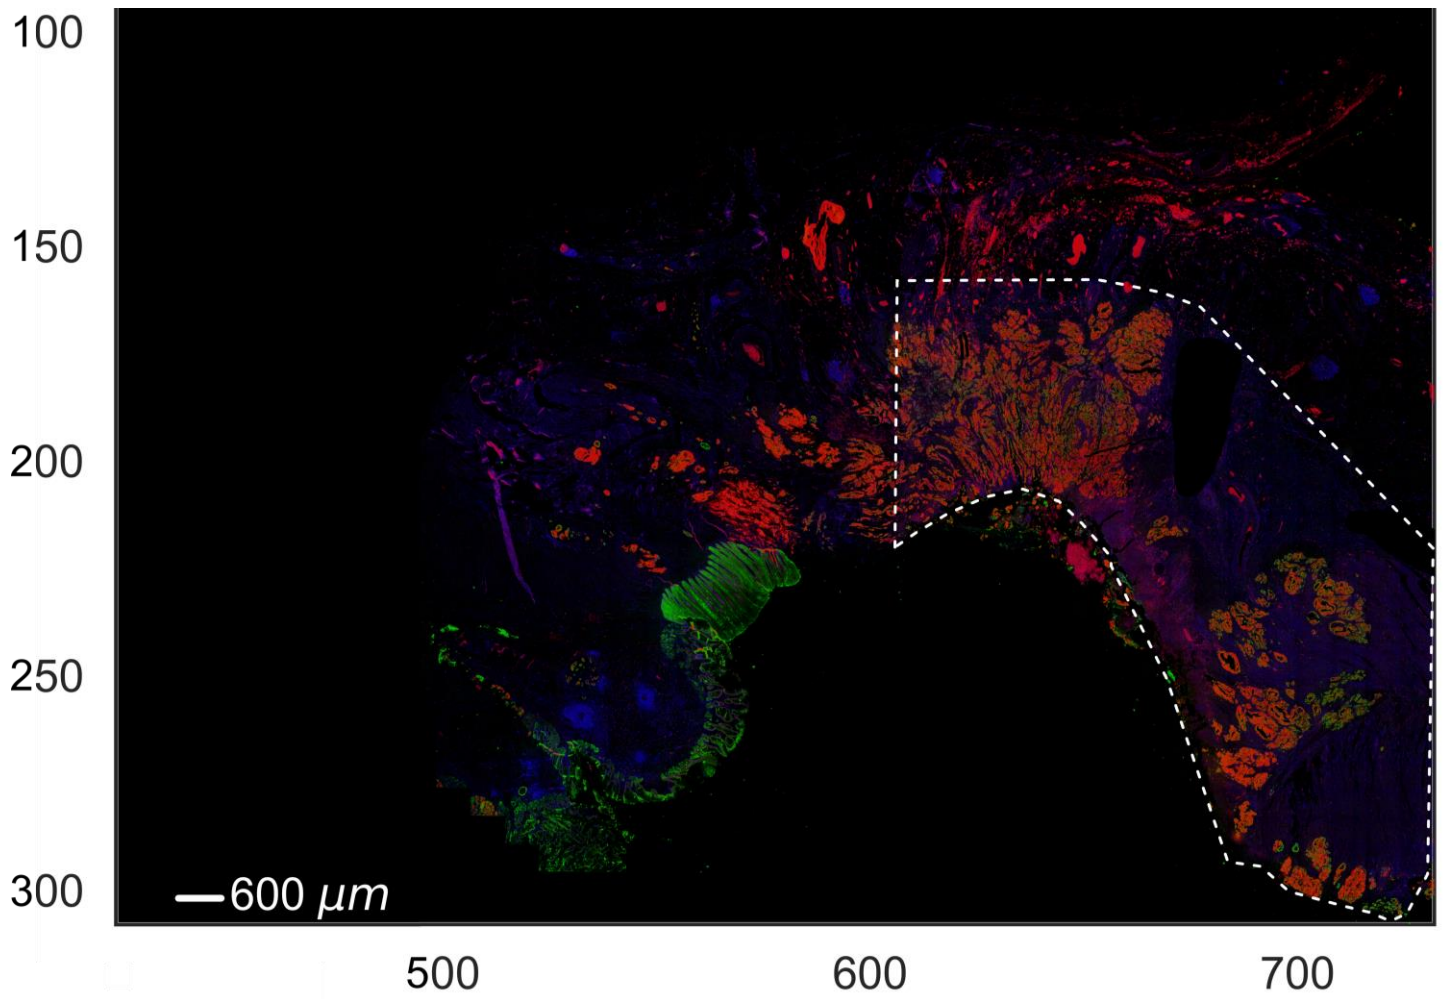

Supplementary figure 8 **Immunohistochemistry staining of a human gastric cancer tissue slide**: DAPI (blue), pancytokeratin (green), HER2/neu (red). The highlighted regions were analyzed with MALDI imaging prior to immunostaining. Tissue folds were excluded (black).

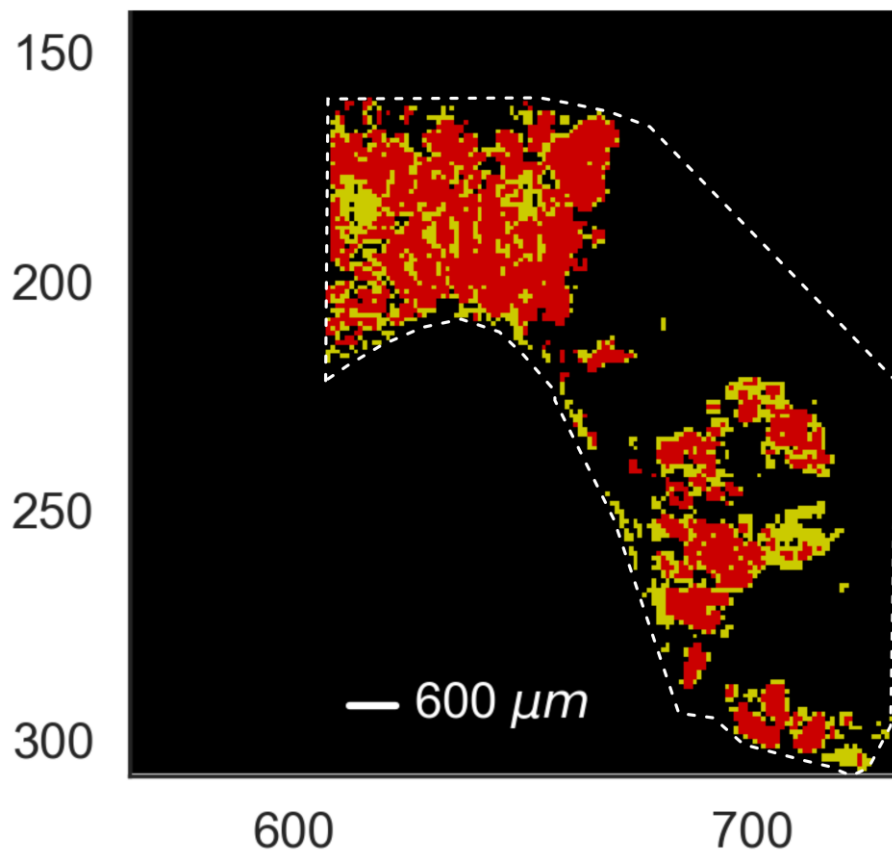

Supplementary figure 9 HER2/neu positive (red) and negative (yellow) tumor region for the tissue depicted in Supplementary figure 8.

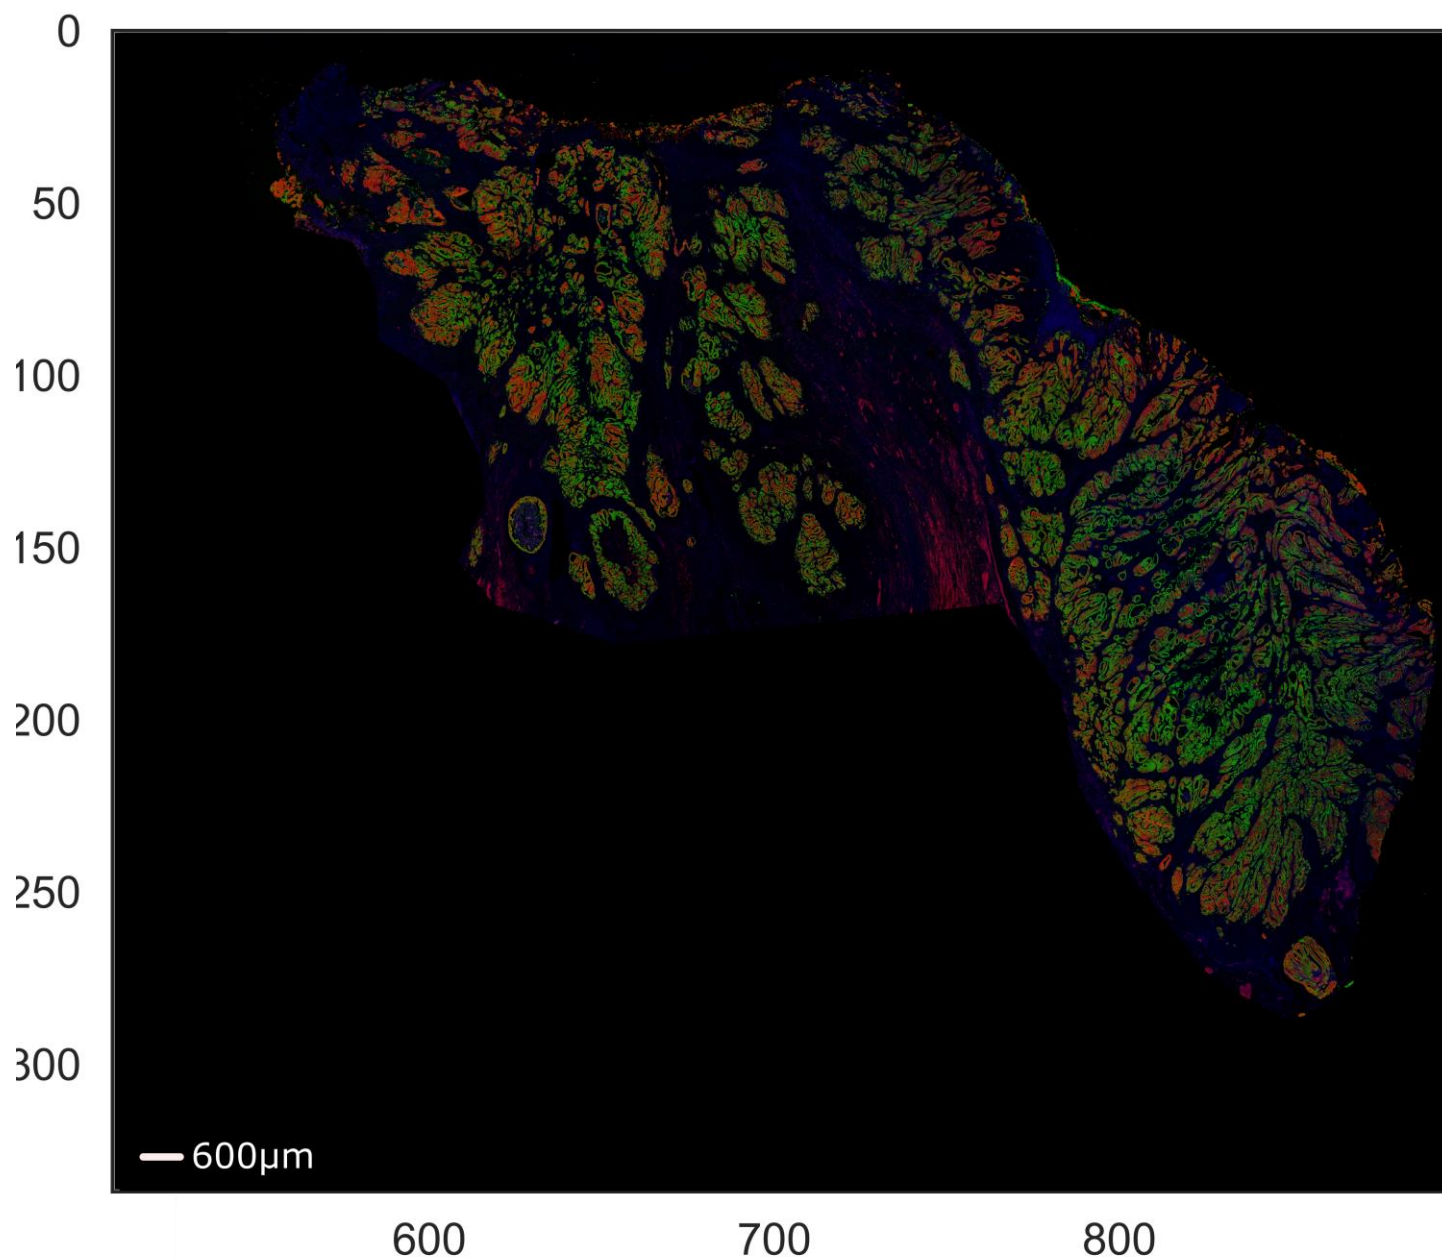

Supplementary figure 10 **Immunohistochemistry staining of a human gastric cancer tissue slide after MALDI imaging**: DAPI (blue), pancytokeratin (green), HER2/neu (red). Tissue folds and artifacts were excluded (black).

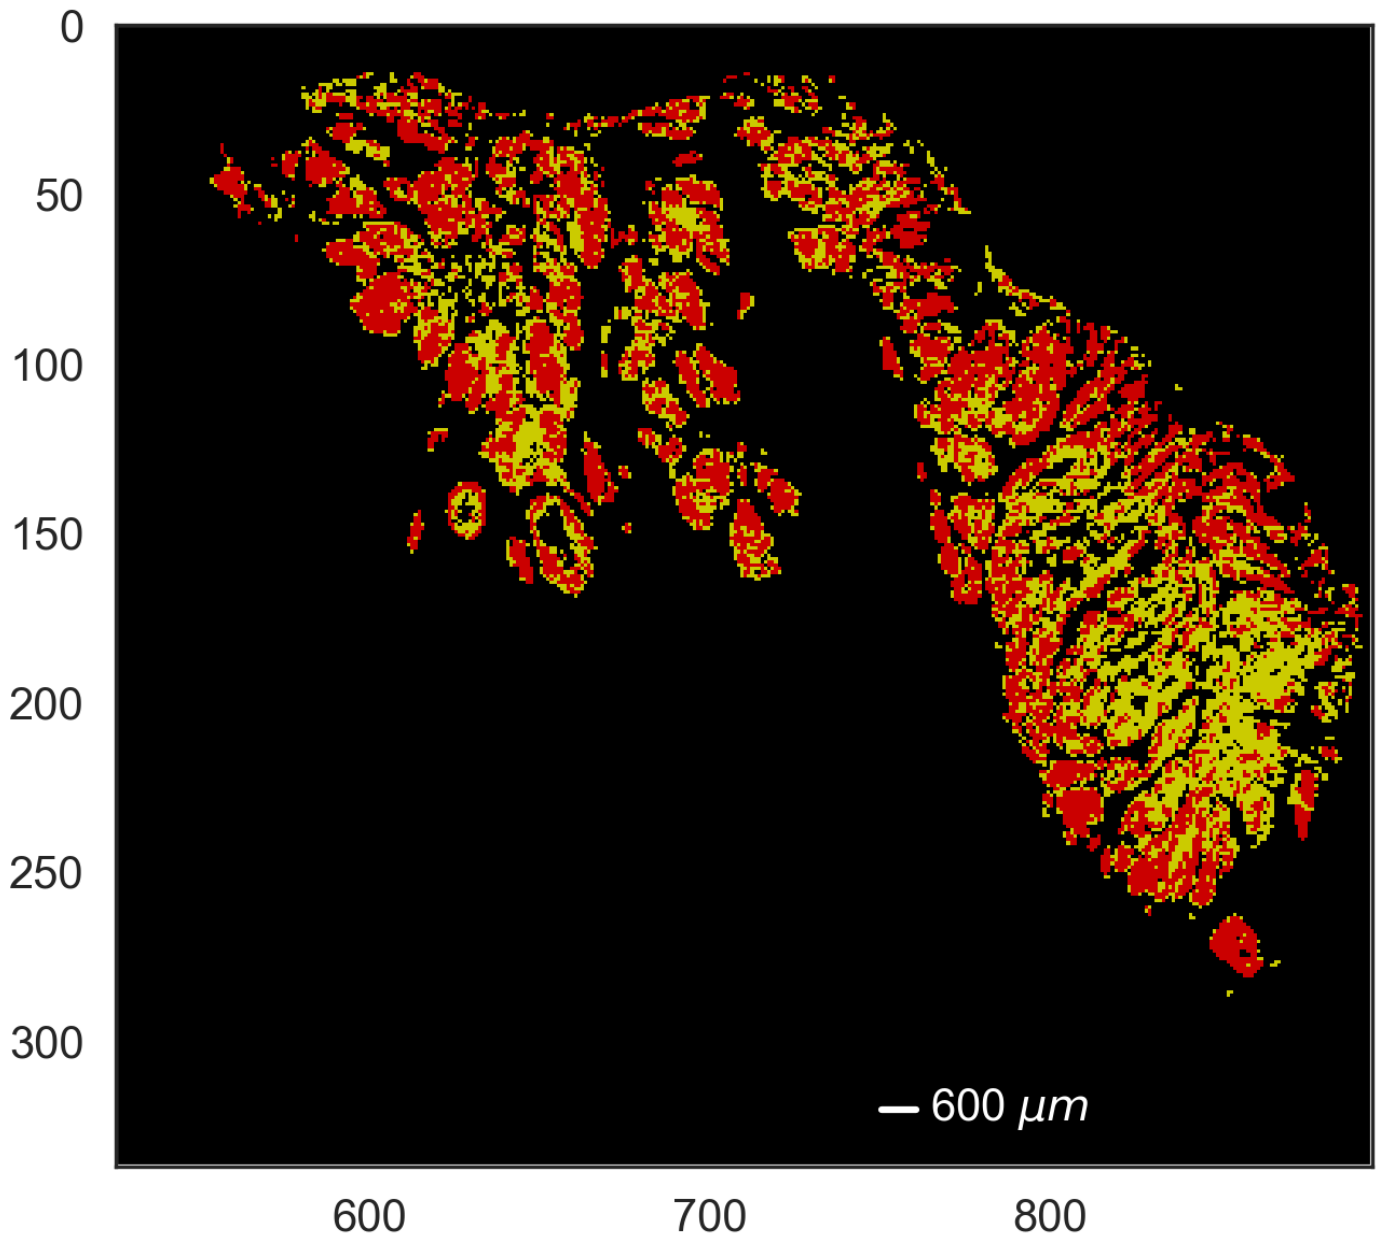

Supplementary figure 11 HER2/neu positive (red) and negative (yellow) tumor region for the tissue depicted in Supplementary figure 10.

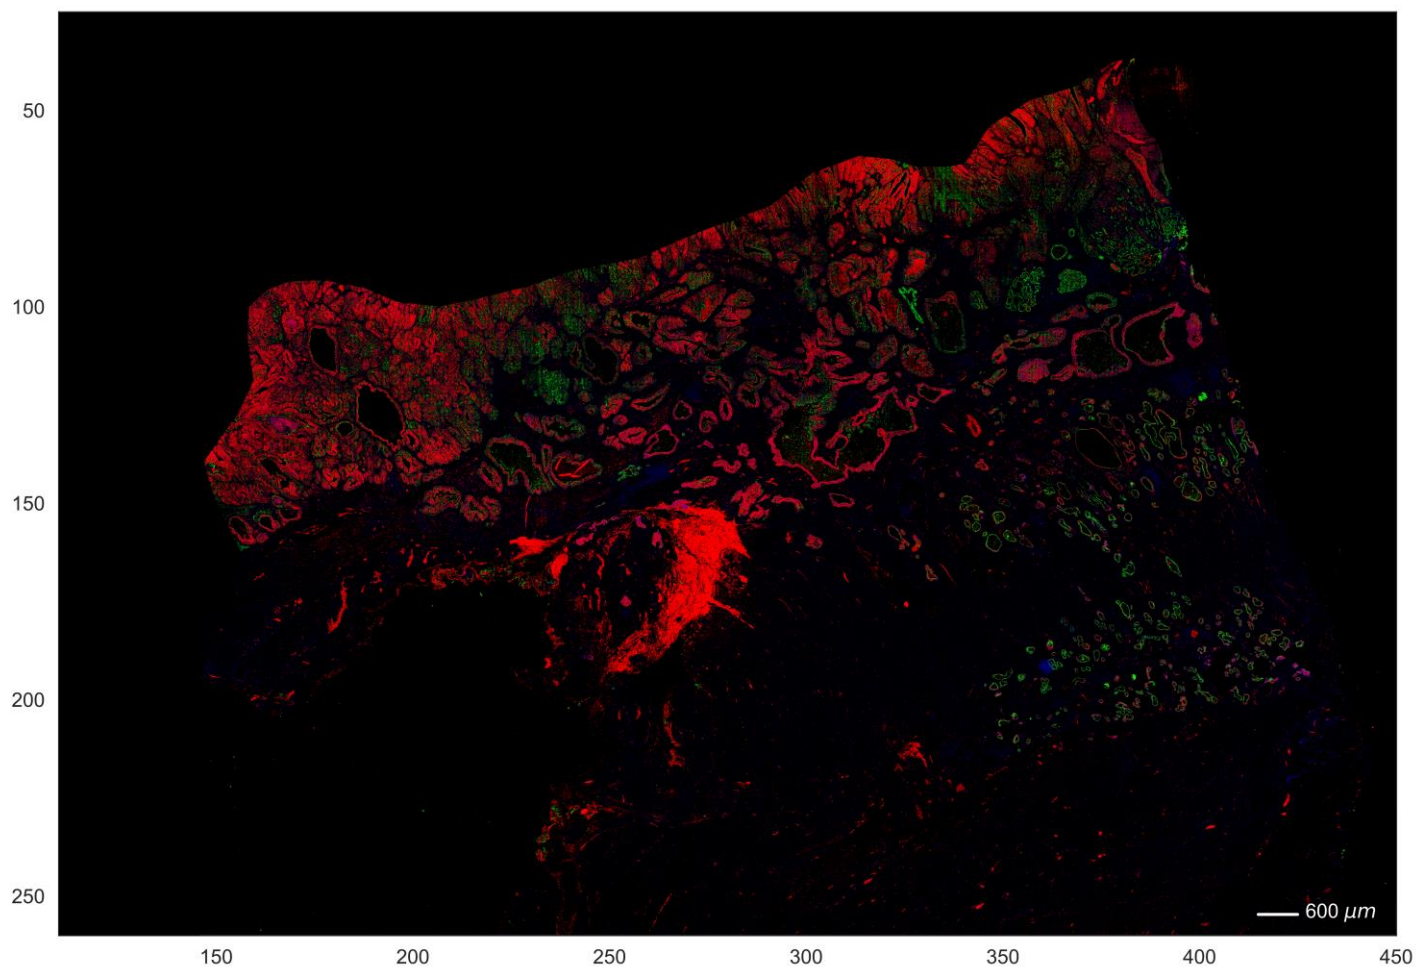

Supplementary figure 12 **Immunohistochemistry staining of a human gastric cancer tissue slide after MALDI imaging**: DAPI (blue), pancytokeratin (green), HER2/neu (red). Tissue folds, artifacts and normal epithel were excluded (black).

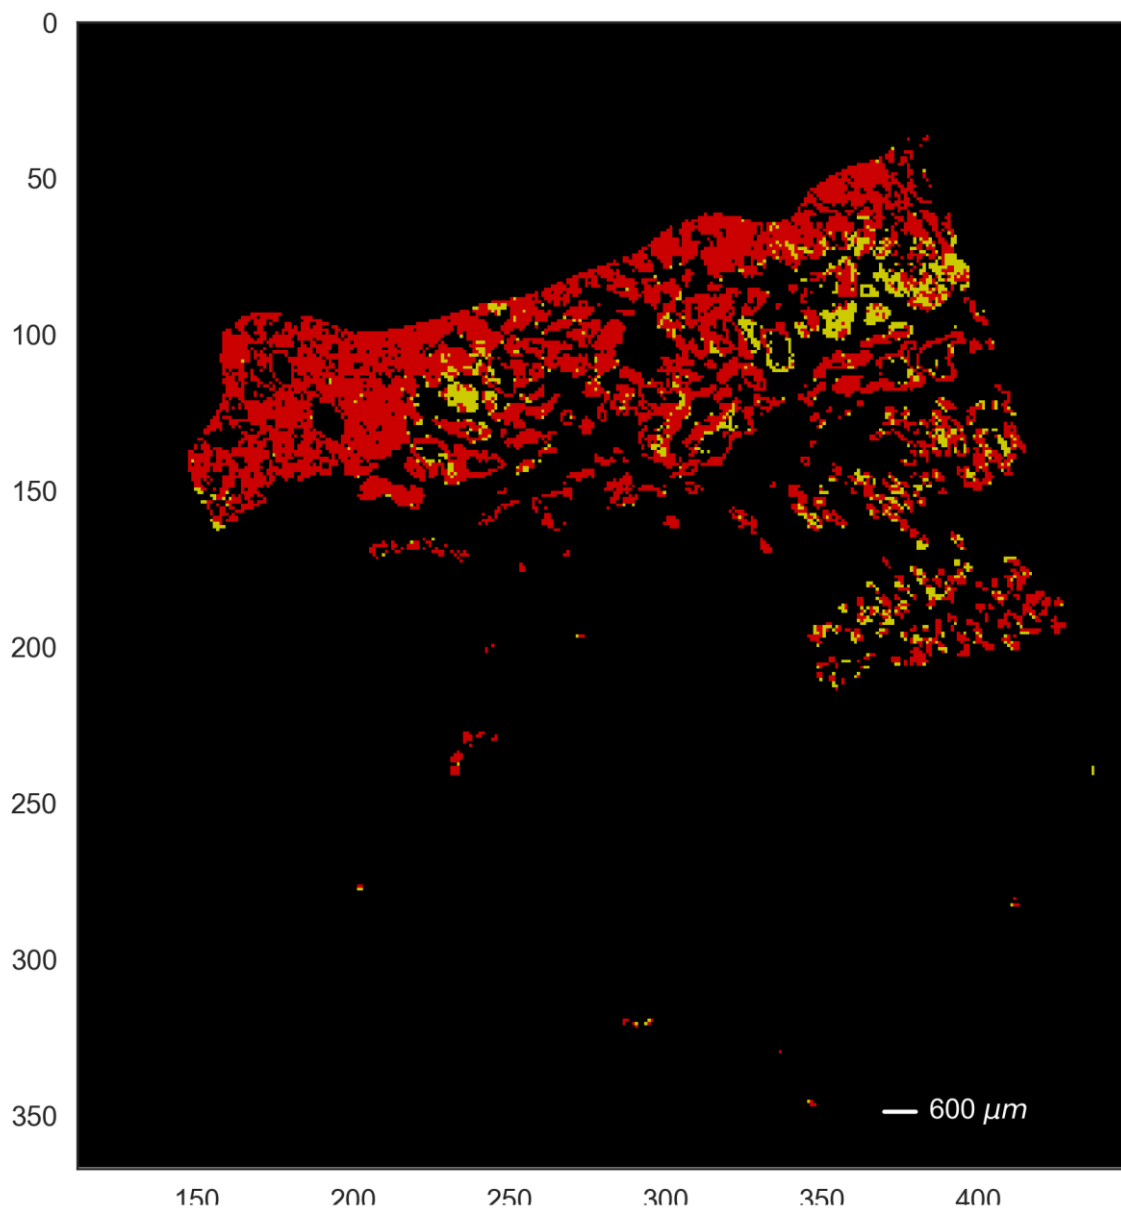

Supplementary figure 13 HER2/neu positive (red) and negative (yellow) tumor region for the tissue depicted in Supplementary figure 12.



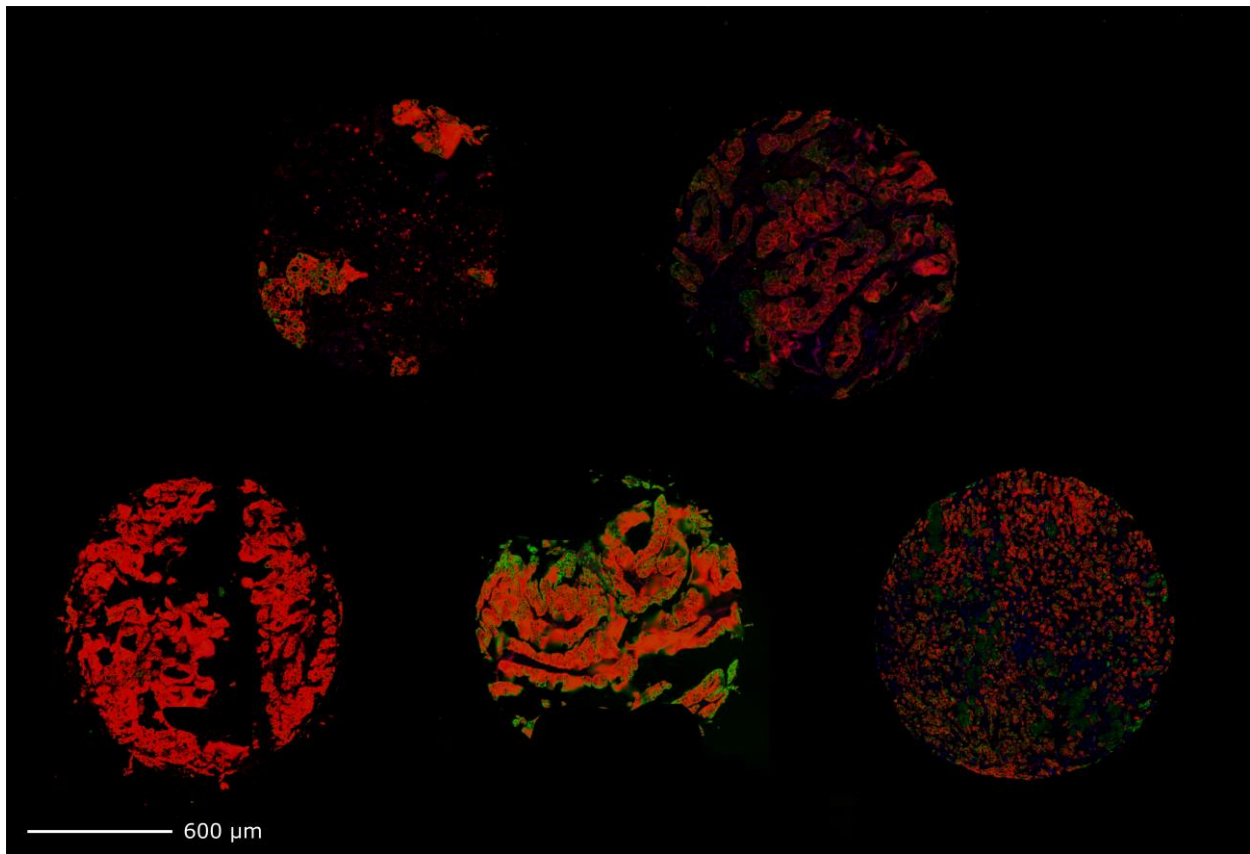

Supplementary figure 14 **Immunohistochemistry staining of human gastric cancer TMA cores after MALDI imaging**: DAPI (blue), pancytokeratin (green), HER2/neu (red). Tissue folds and artifacts were excluded (black).

A positive

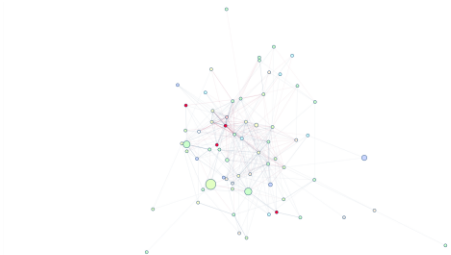

A negative

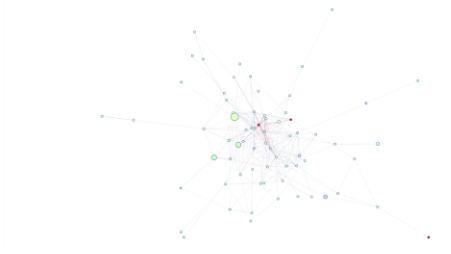

B positive

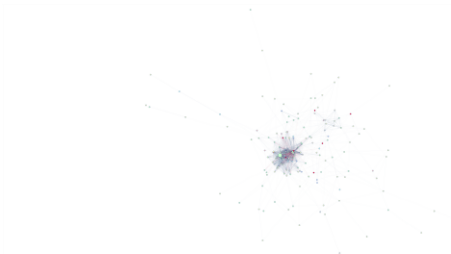

B negative

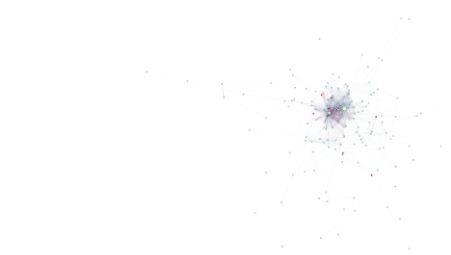

C positive

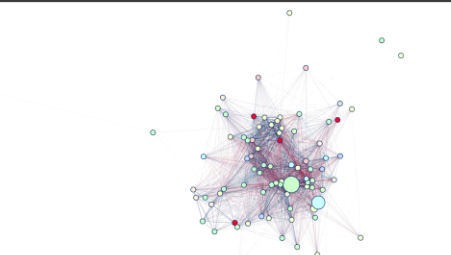

C negative

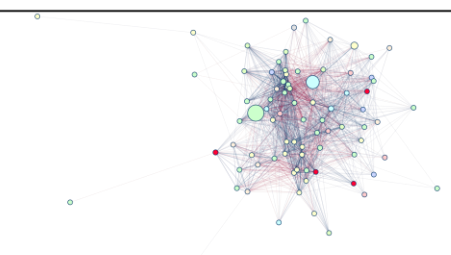

Supplementary figure 15 **Spatial correlation networks of metabolites in three human gastric tissue sections with gastroesophageal carcinomas.** Order corresponding to images in figure 6.

TMA core 1

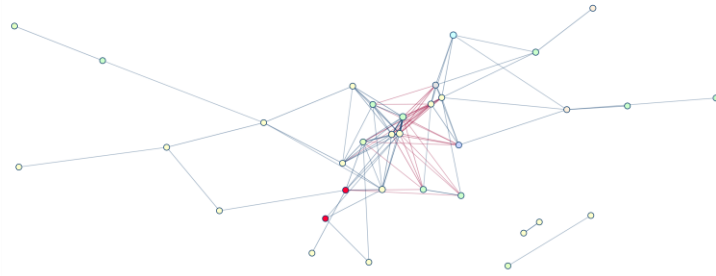

TMA core 2

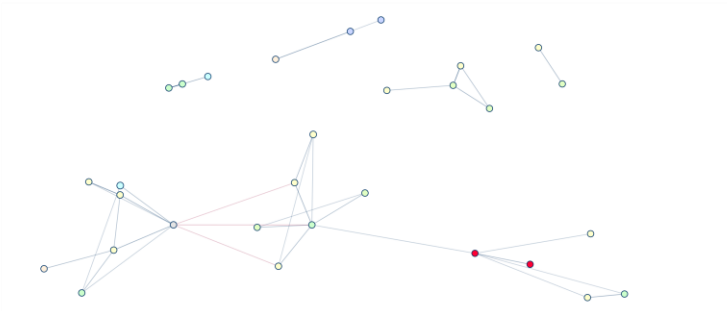

TMA core 3

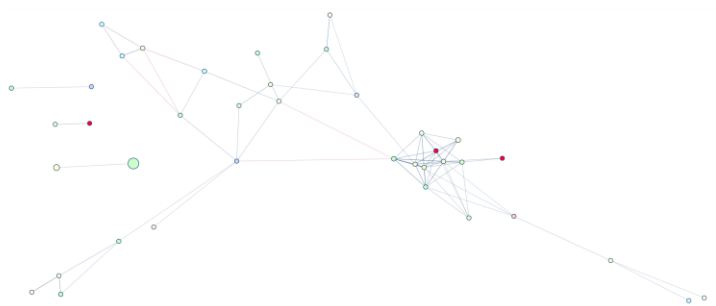

TMA core 4

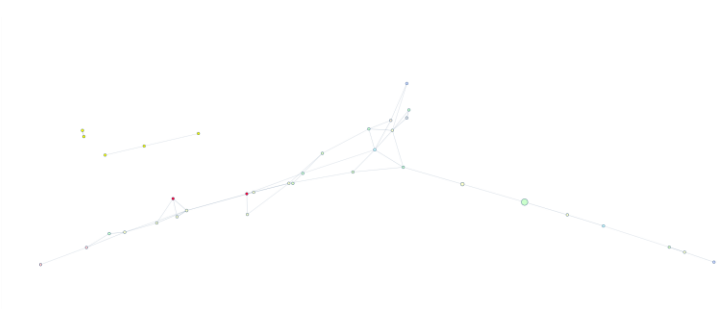

TMA core 5

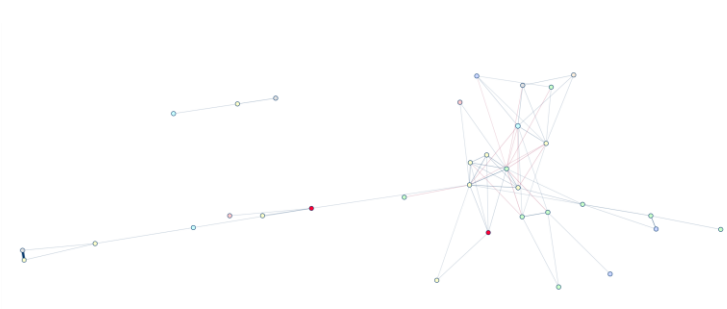

Supplementary figure 16 **Spatial correlation networks of metabolites in five tissue microarray cores human gastric tissue sections with gastroesophageal carcinomas.** Order corresponding to images in figure 7.

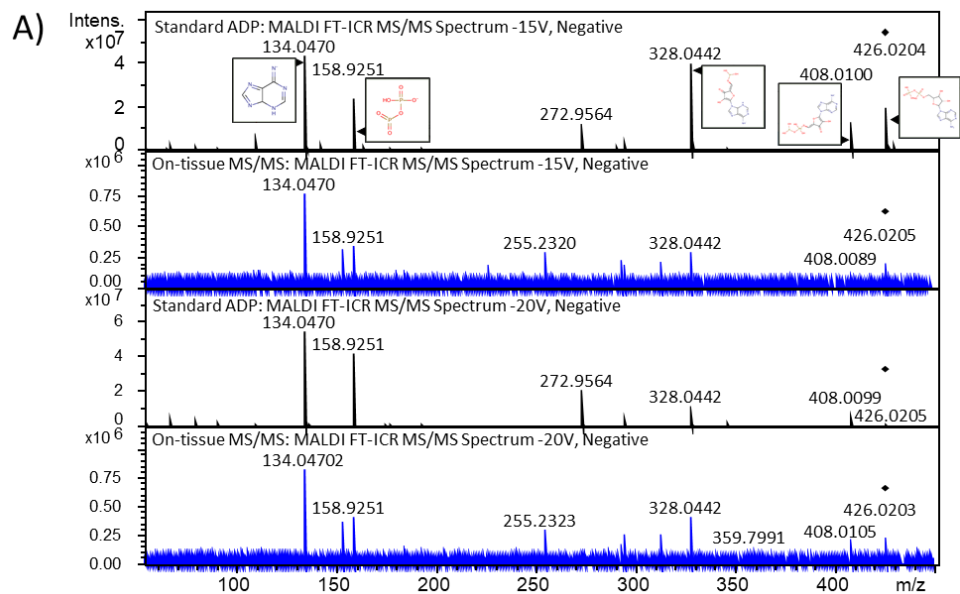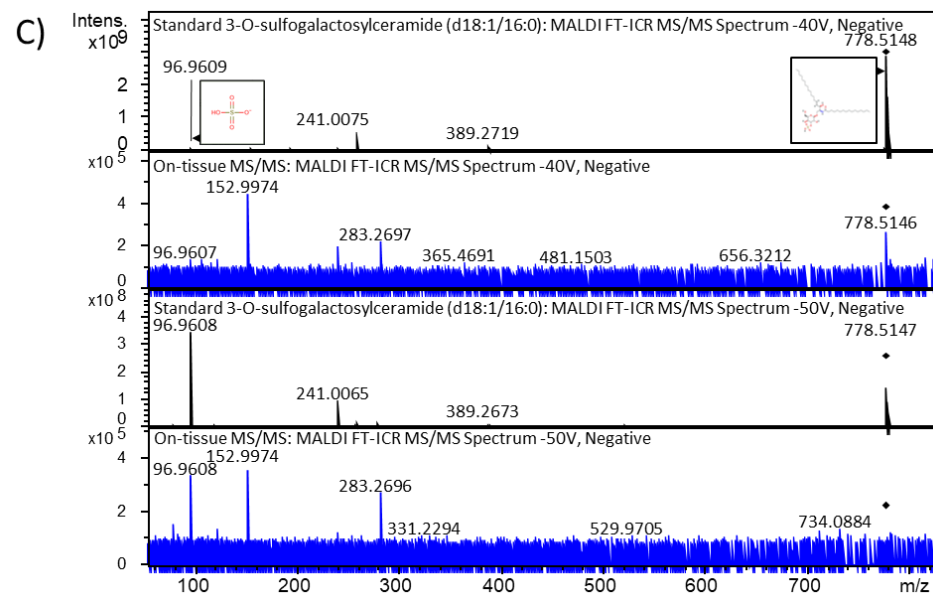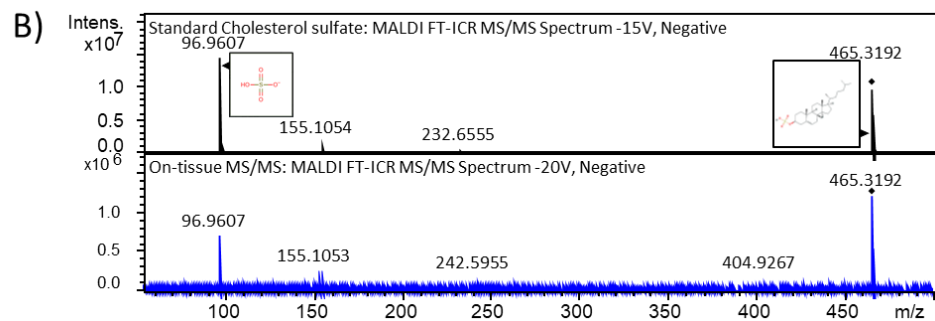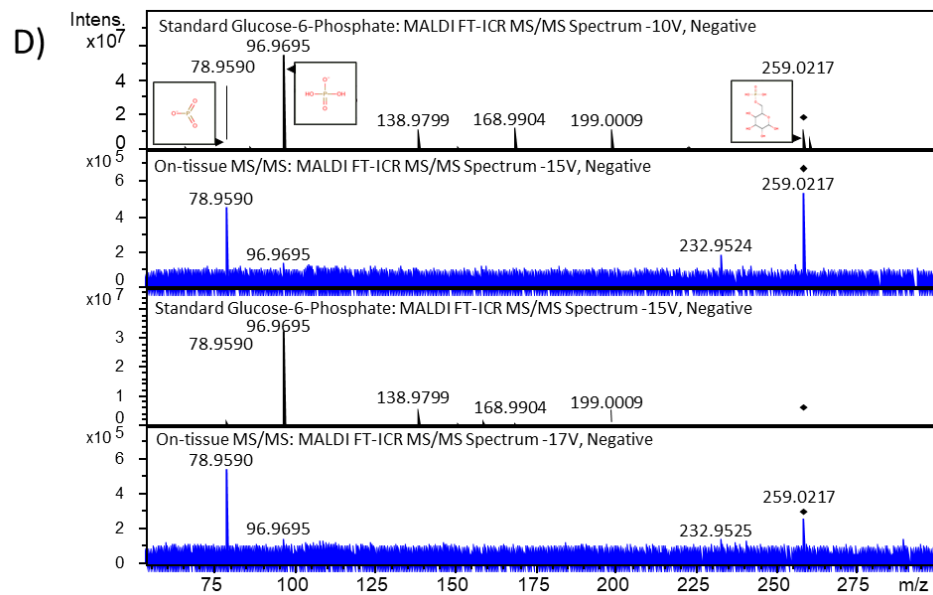

Supplementary figure 17: **Identification of metabolites detected on islets of Langerhans on consecutive mouse pancreatic tissue section (see MALDI images of Figures 3 and 4) compared to standard compounds:** A) ADP, B) cholesterol sulfate, C) 3-O-sulfogalactosylceramide (d18:1/16:0) and D) glucose-6-phosphate. The parent ions were isolated and fragmented by MALDI FTICR on-tissue MS/MS using quadrupole collision-induced dissociation (CID).
